# Supplementary material
Source: publisher figshare collection journal article supplement (https://sage.figshare.com/ndownloader/files/13612328)
Supplement: Supplementary file 1 [file 13612328]

## **Exercise 1. Drawing Exercise (Meaning)**

### Prompt for Individual Exercise

What does effective leadership look like? Draw a picture or symbols to illustrate below.

Prompt for Class Discussion

Describe each picture and interpret its meaning

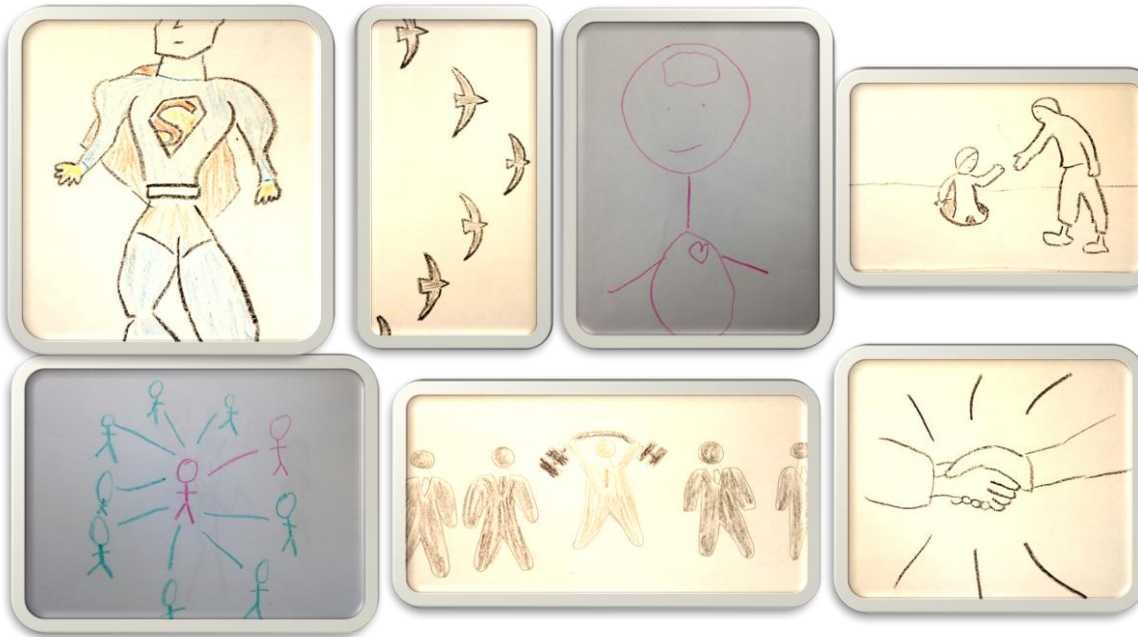

**Question Prompt:** What is leadership? What does it mean to you? Write your definition of leadership here.
